# Supplementary material for: Discrimination of Olive Oil and Extra-Virgin Olive Oil from Other Vegetable Oils by Targeted and Untargeted HRMS Profiling of Phenolic and Triterpenic Compounds Combined with Chemometrics
Source: MDPI journal article supplement (doi:10.3390/ijms24065292), 2023-03-10
Supplement: s1 [file s1]

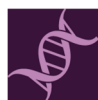

Supplementary materials

# Discrimination of Olive Oil and Extra-Virgin Olive Oil from Other Vegetable Oils by Targeted and Untargeted HRMS Profiling of Phenolic and Triterpenic Compounds Combined with Chemometrics

Elisabeta-Irina Geana <sup>1</sup>, Corina Teodora Ciucure <sup>1</sup>, Irina Mirela Apetrei <sup>2</sup>, Maria Lisa Clodoveo <sup>3</sup> and Constantin Apetrei <sup>4,\*</sup>

<sup>1</sup> National Research and Development Institute for Cryogenics and Isotopic Technologies—ICSI, Rm. Valcea, 240050 Râmnicu Vâlcea, Romania

<sup>2</sup> Department of Pharmaceutical Sciences, Medical and Pharmaceutical Research Center, Faculty of Medicine and Pharmacy, “Dunarea de Jos” University of Galati, 800008 Galati, Romania

<sup>3</sup> Interdisciplinary Department of Medicine, University Aldo Moro Bari, 70125 Bari, Italy

<sup>4</sup> Department of Chemistry, Physics and Environment, “Dunarea de Jos” University of Galati, 800008 Galati, Romania

\* Correspondence: apetreic@ugal.ro; Tel.: +40-727-580914

**Table S1.** Phenolic compounds from different oil types (EVOO\* - authentic extra virgin oils, EVOO – commercially available extra virgin oils, VOO – commercially available virgin olive oil, SF – sunflower oils, other vegetable oils including walnut, grape seed, pumpkin, linseed, soybean, sesame, palm, hemp and coconut oils) expressed as µg/g of oil.

| Compounds                 | EVOO*                  | EVOO                   | VOO                    | SF                     | Vegetable oils         |
|---------------------------|------------------------|------------------------|------------------------|------------------------|------------------------|
| 3,4-Dihydroxybenzoic acid | 0.04±0.03 (n.d.-0.12)  | 0.03±0.02 (0.01-0.06)  | 0.03±0.02 (n.d. -0.06) | 0.01±0.02 (n.d. -0.04) | 0.01±0.00 (n.d. -0.02) |
| 4-Hydroxybenzoic acid     | 0.07±0.03 (n.d.-0.13)  | 0.08±0.03 (0.04-0.12)  | 0.06±0.04 (n.d. -0.13) | 0.03±0.05 (n.d. -0.12) | 0.07±0.13 (n.d. -0.38) |
| t-Ferulic acid            | 0.11±0.07 (n.d.-0.30)  | 0.10±0.05 (0.05-0.18)  | 0.09±0.08 (0.01-0.24)  | 0.09±0.18 (n.d. -0.42) | 0.22±0.27 (0.01-1.01)  |
| Chlorogenic acid          | n.d. (0.00-0.01)       | n.d. (n.d. -0.01)      | 0.01±0.02 (n.d. -0.09) | 0.02±0.03 (n.d. -0.08) | 0.01±0.01 (n.d. -0.05) |
| Cinnamic acid             | 2.81±1.48 (n.d.-5.08)  | 2.78±0.83 (1.92-3.82)  | 2.34±1.42 (0.02-4.83)  | 0.33±0.66 (0.01-1.52)  | 0.10±0.11 (0.01-0.37)  |
| p-Coumaric acid           | 0.31±0.20 (n.d.-0.81)  | 0.46±0.08 (0.37-0.54)  | 0.33±0.20 (0.01-0.71)  | 0.02±0.04 (0.01-0.09)  | 0.04±0.05 (0.01-0.18)  |
| Ellagic acid              | 0.04±0.05 (n.d.-0.18)  | 0.02±0.01 (n.d. -0.04) | 0.04±0.05 (n.d. -0.16) | 0.06±0.06 (0.01-0.16)  | 0.17±0.21 (0.02-0.73)  |
| Absciscic acid            | 0.01±0.01 (n.d.-0.04)  | 0.01±0.01 (n.d. -0.02) | 0.01±0.01 (n.d. -0.03) | 0.05±0.11 (0.00-0.24)  | 0.03±0.11 (n.d. -0.42) |
| Rutin                     | n.d. (n.d. -0.01)      | n.d.                   | 0.01±0.01 (n.d. -0.03) | 0.01±0.00 (0.01-0.02)  | 0.02±0.00 (0.01-0.03)  |
| Quercetin                 | n.d. (n.d. -0.02)      | 0.01±0.02 (n.d. -0.04) | 0.01±0.02 (n.d. -0.06) | 0.00±0.01 (n.d. -0.01) | 0.01±0.01 (n.d. -0.05) |
| Isorhamnetin              | 0.01±0.01 (n.d. -0.04) | 0.01±0.01 (n.d. -0.02) | 0.01±0.01 (n.d. -0.05) | 0.01±0.02 (n.d. -0.05) | 0.02±0.01 (n.d. -0.04) |
| Kaempferol                | n.d. (n.d. -0.01)      | n.d.                   | 0.00±0.00 (n.d. -0.02) | 0.00±0.00 (n.d. -0.01) | 0.02±0.02 (n.d. -0.05) |
| Apigenin                  | 1.58±1.60 (n.d.-6.49)  | 1.03±0.34 (0.74-1.58)  | 1.03±0.67 (0.01-1.95)  | 0.01±0.01 (n.d.-0.02)  | 0.02±0.01 (0.01-0.05)  |
| Pinocembrin               | 0.02±0.03 (n.d.-0.11)  | 0.11±0.05 (0.02-0.16)  | 0.07±0.09 (0.01-0.38)  | 0.01±0.02 (0.01-0.04)  | 0.01±0.00 (n.d. -0.02) |
| Chrysin                   | 0.01±0.00 (n.d. -0.02) | 0.01±0.00 (n.d. -0.01) | 0.01±0.00 (0.00-0.02)  | 0.01±0.00 (n.d. -0.01) | 0.01±0.01 (n.d. -0.04) |
| Hydroxytyrosol            | 5.44±8.11 (0.01-24.58) | 3.66±4.61 (0.01-10.72) | 0.87±1.57 (n.d.-5.38)  | n.d.                   | n.d.                   |
| Tyrosol                   | 0.53±0.88 (n.d.-2.55)  | 1.19±1.81 (n.d.-4.36)  | 1.89±2.73 (n.d.-10.39) | 3.24±2.97 (0.39-7.32)  | 5.19±4.09 (n.d.-12.76) |

|                |                         |                          |                         |                        |                          |
|----------------|-------------------------|--------------------------|-------------------------|------------------------|--------------------------|
| Trigoneline    | 11.87±7.24 (0.83-22.51) | 14.78±11.50 (5.77-34.06) | 9.70±6.44 (2.07-26.99)  | 4.78±5.09 (1.01-13.58) | 12.08±17.44 (n.d.-65.13) |
| Verbascoside   | 0.41±0.13 (0.31-0.76)   | 0.36±0.07 (0.30-0.47)    | 0.34±0.10 (0.29-0.77)   | 0.18±0.17 (n.d.-0.31)  | 0.28±0.08 (n.d.-0.31)    |
| Oleuropein     | 9.75±5.56 (0.81-18.91)  | 14.04±7.44 (0.30-21.81)  | 10.44±7.94 (0.81-33.00) | 4.63±4.93 (2.01-33.00) | 7.66±8.18 (n.d.-32.10)   |
| Maslinic_acid  | 2.58±1.55 (0.76-5.84)   | 4.31±5.59 (1.62-14.31)   | 5.52±5.32 (0.24-18.73)  | 0.11±0.08 (n.d.-0.22)  | 0.49±1.20 (n.d.-4.53)    |
| Oleanolic_acid | 0.17±0.17 (0.03-0.66)   | 2.05±2.30 (0.69-6.15)    | 2.96±4.53 (0.07-16.07)  | 0.65±0.25 (0.25-0.91)  | 1.28±4.11 (n.d.-15.45)   |

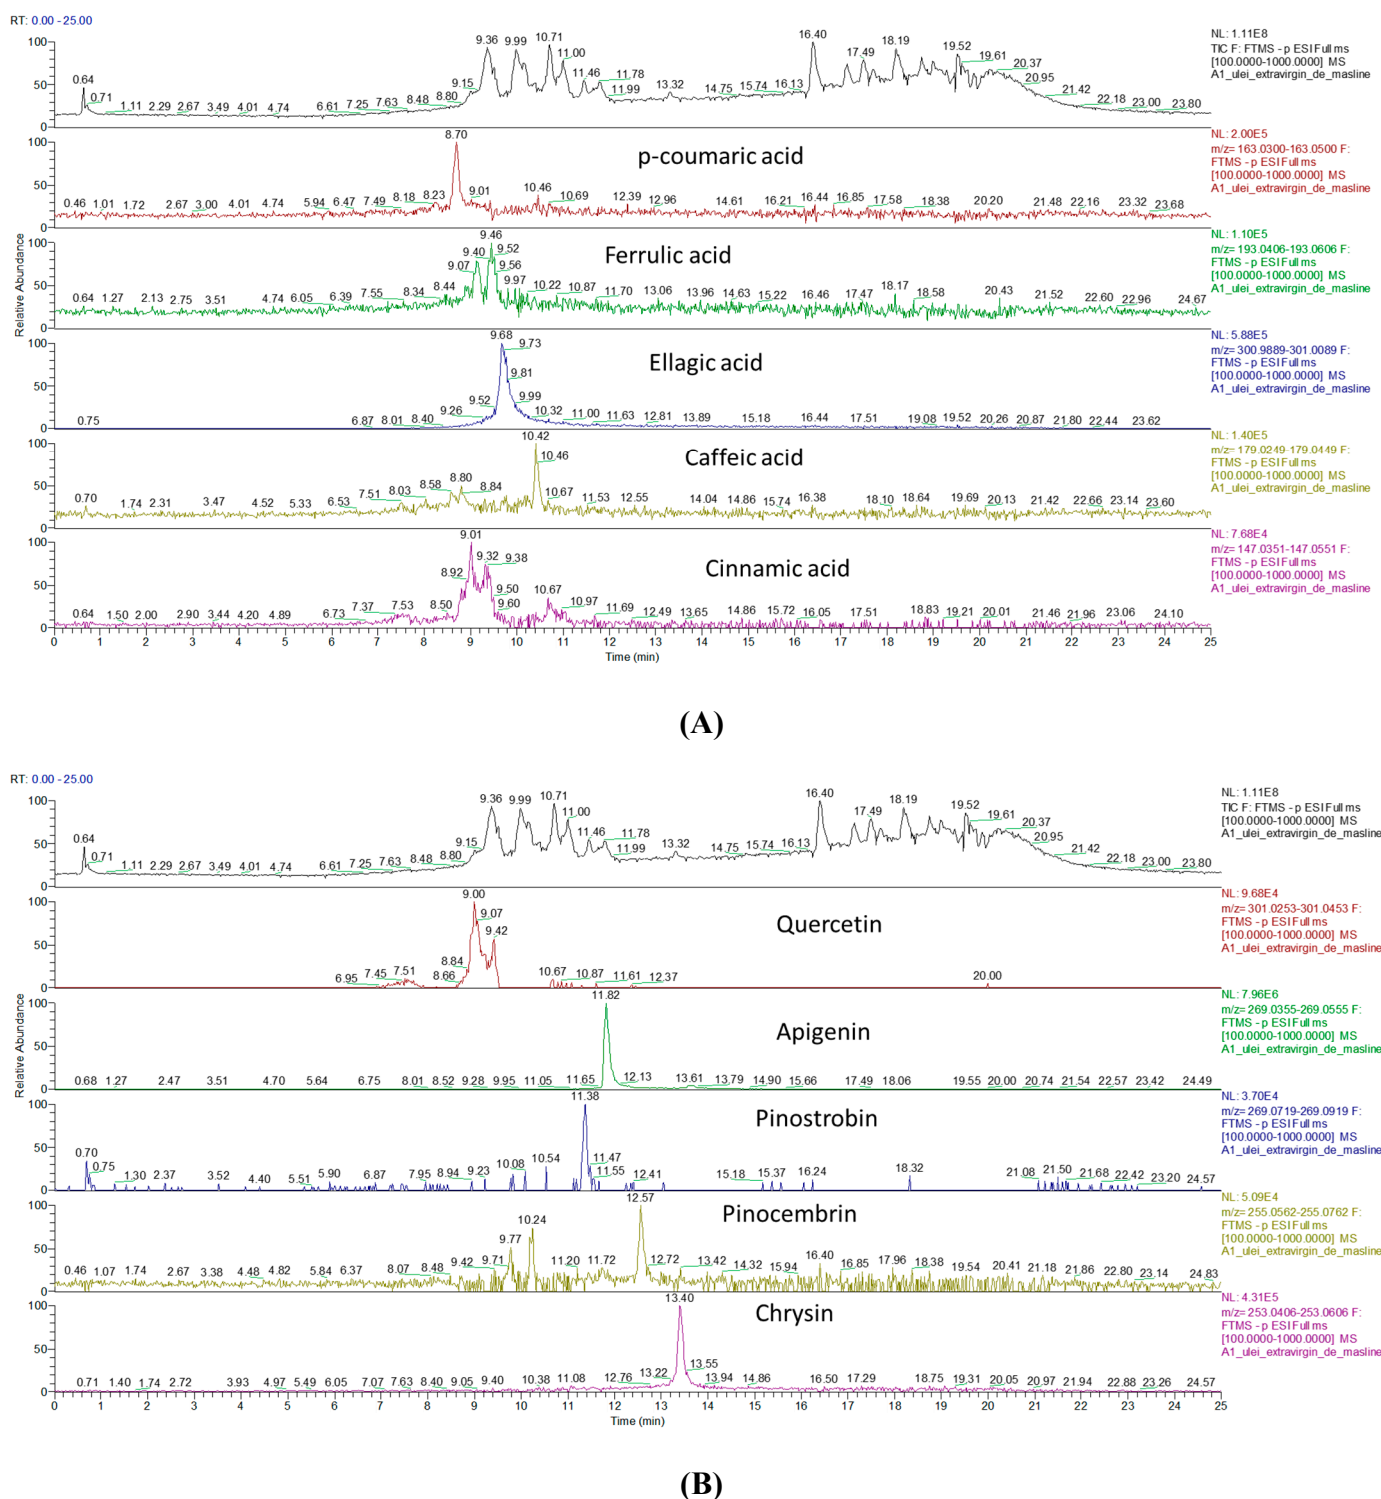

**Figure S1.** TIC and the extracted chromatograms of the minor phenolic compounds quantified in liquid extract of extra virgin olive oil (the chromatograms were extracted from TIC using a 5 ppm mass accuracy window; negative ion mode, full scan, base peak in the range 75–1000 m/z): (A) phenolic acids, (B) flavonoids

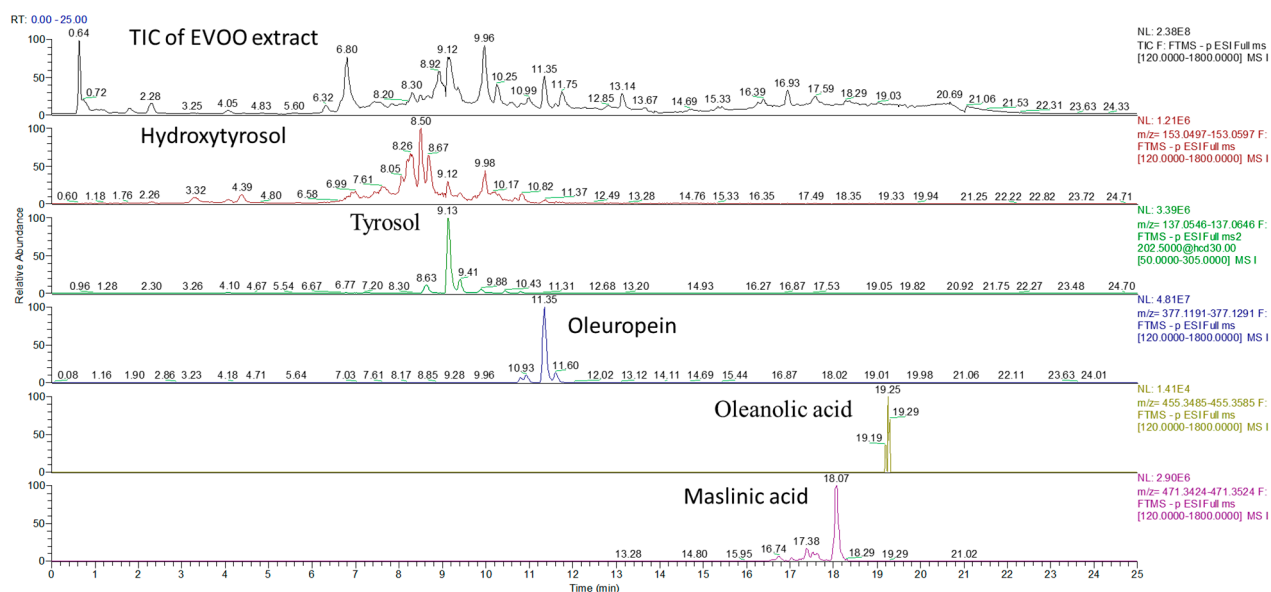

**Figure S2.** TIC and the extracted chromatograms of the phenolic and triterpenic compounds quantified in liquid extract of extra virgin olive oil (the chromatograms were extracted from TIC using a 5 ppm mass accuracy window; negative ion mode, full scan, base peak in the range 75-1000 m/z).

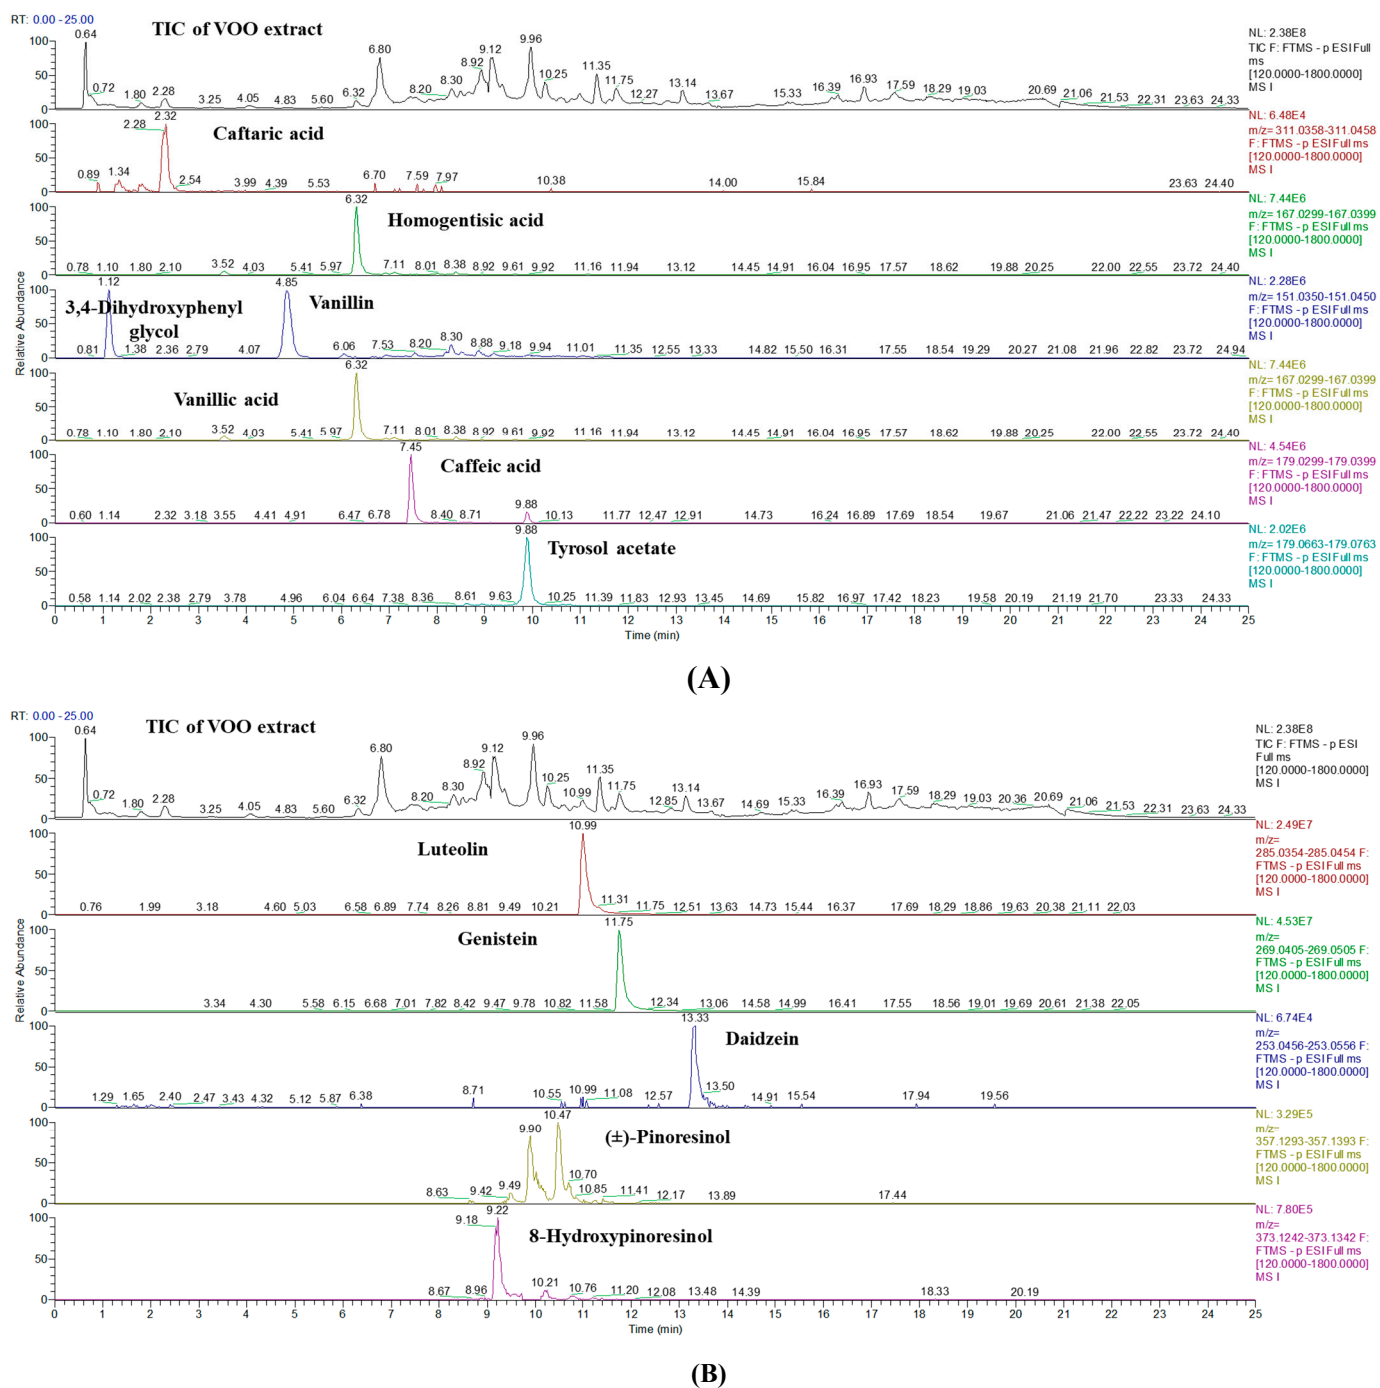

**Figure S3.** TIC and the extracted chromatograms of the specific compounds identified in VOO extract (the chromatograms were extracted from TIC using a 5 ppm mass accuracy window; negative ion mode, full scan, base peak in the range 75–1000 m/z): (A) simple phenols & derivatives and (B) flavonoids and lignans.

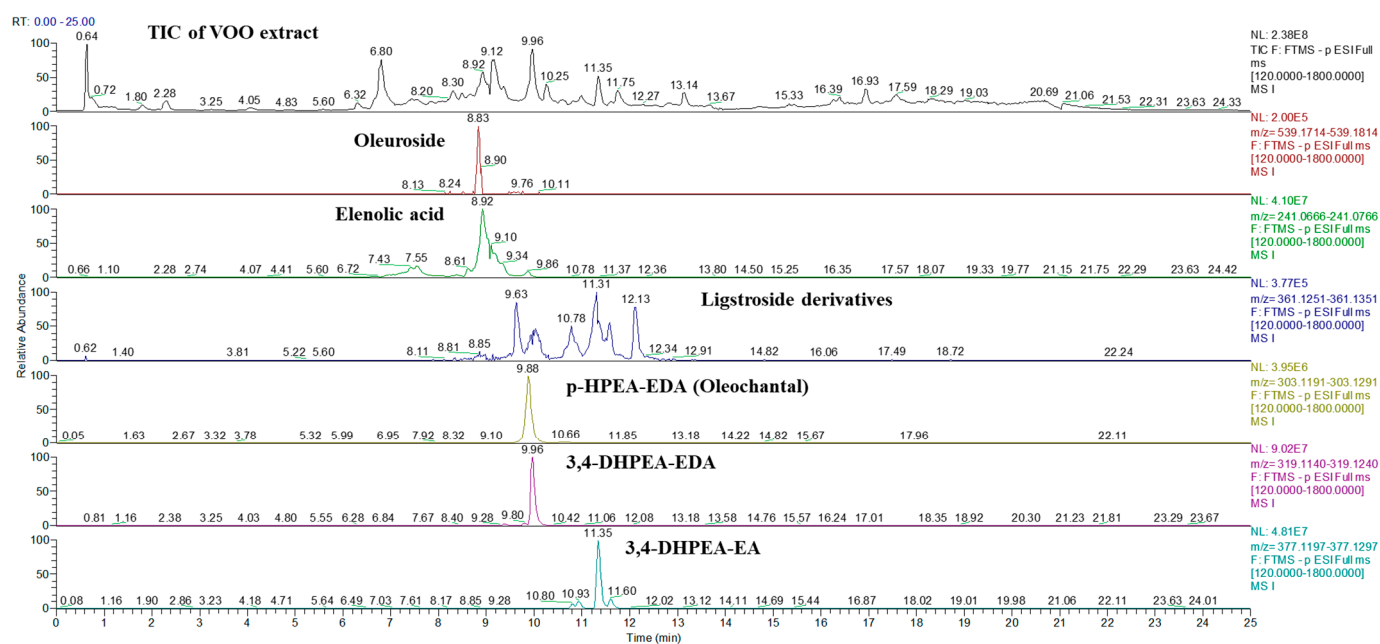

**Figure S4.** TIC and the extracted chromatograms of the secoiridoids and derivatives identified in VOO extract (the chromatograms were extracted from TIC using a 5 ppm mass accuracy window; negative ion mode, full scan, base peak in the range 75-1000 m/z).
